# Supplementary material for: A CaCuSi4O10/GCE electrochemical sensor for detection of norfloxacin in pharmaceutical formulations
Source: Royal Society of Chemistry journal article supplement (doi:10.1039/d3ra01702h), 2023-01-01
Supplement: d3ra01702h1.pdf [file d3ra01702h1.pdf]

**ELECTRONIC SUPPLEMENTARY INFORMATION**

**CaCuSi<sub>4</sub>O<sub>10</sub>/GCE electrochemical sensor for detection of norfloxacin in  
pharmaceutical formulations**

Gregarious Muungani, and Werner E. van Zyl\*

School of Chemistry and Physics, University of KwaZulu-Natal, Westville Campus, Durban,  
4000, South Africa.

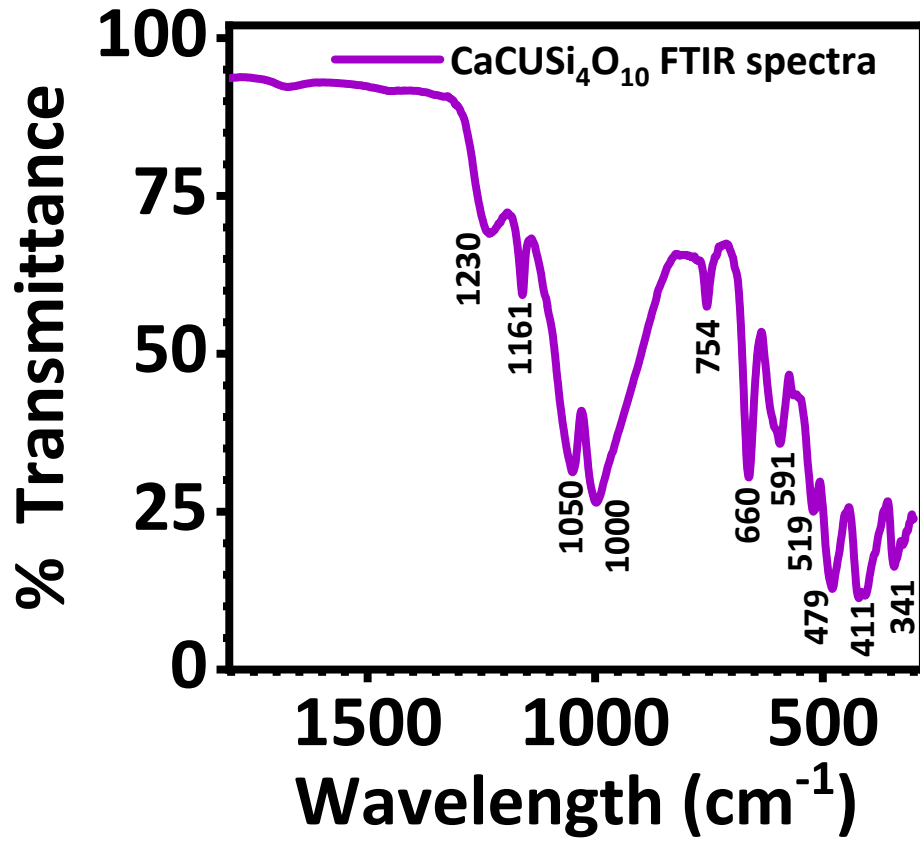

Fig. S1. FTIR spectra of  $\text{CaCuSi}_4\text{O}_{10}$ .

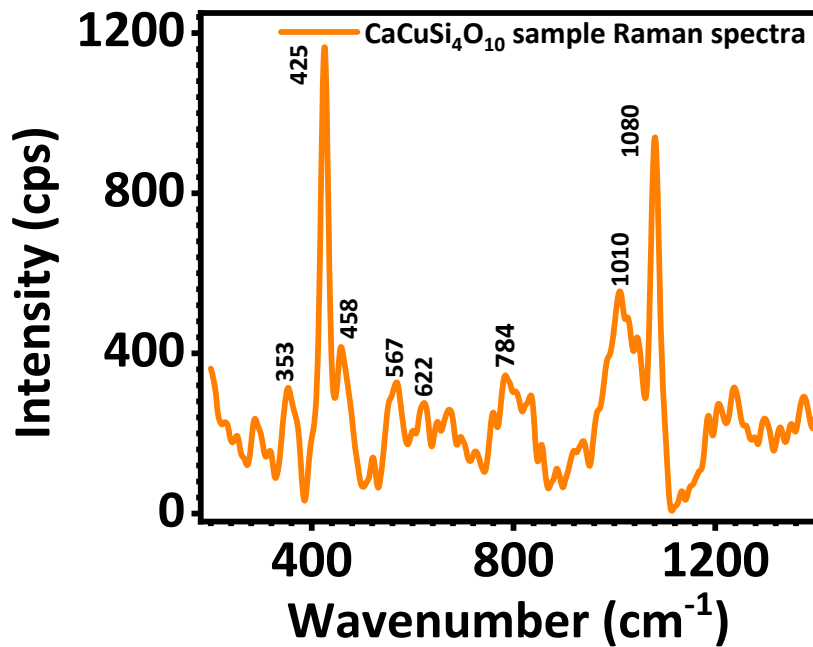

Fig. S2. Raman spectra of  $\text{CaCuSi}_4\text{O}_{10}$ .

**Table S1**Results obtained for Utin-400 at MnO<sub>2</sub> doped CaCuSi<sub>4</sub>O<sub>10</sub>/GCE modified electrode.

| <b>S No</b> | <b>Expected (μM)</b> | <b>Detected (μM)</b> | <b>Recovery</b> | <b>Bias (%)</b> | <b>RSD (%)<br/>(n=3)</b> |
|-------------|----------------------|----------------------|-----------------|-----------------|--------------------------|
| 1           | 10                   | 10.0135              | 100.1           | 0.135           | 0.48                     |
| 2           | 20                   | 19.6863              | 99.9            | 1.6             | 0.62                     |
| 3           | 30                   | 30.685               | 102.3           | 2.28            | 0.17                     |
| 4           | 40                   | 40.586               | 101.5           | 1.5             | 0.36                     |
| 5           | 50                   | 50.692               | 101.4           | 1.4             | 0.89                     |
| 6           | 70                   | 71.62                | 102.3           | 0.9             | 0.53                     |
| 7           | 80                   | 78.483               | 98.1            | 1.9             | 1.04                     |
